# Supplementary material for: Candidate genes and functional noncoding variants identified in a canine model of obsessive-compulsive disorder
Source: PubMed Central journal article supplement (PMC4038740; doi:10.1186/gb-2014-15-3-r25), 2014-03-14
Supplement: gb-2014-15-3-r25-S1.pdf [file gb-2014-15-3-r25-S1.pdf]

## SUPPLEMENTARY INFORMATION

### Text S1. Variants identified from gene-based analysis

#### *ATXN1*

*ATXN1* showed a strong enrichment of case-only variants in constrained elements (10 vs. 4; **Figure 3a** and **Table S8**). Two dogs contributed to the case-only variants found in *ATXN1* (1 JR case, seven variants; 1 SS case, three variants). Of these ten case-only variants, six (five JR case variants and one SS case variants) were found in the first intron, clustering near the 5' end (**Figure 3c**). Of the remaining four, two variants were found in a SS case, one within the 3'UTR and the other in intron 3 (**Figure 3c**). The other two that were identified in a JR case failed to be aligned to hg19.

#### *CDH2*

*CDH2*, a gene previously associated with OCD in DP population[1], showed the strongest enrichment of case-only variants, not only in the DP samples (case-only vs. control-only variants, 272 vs. 118), but also in all the breeds together in our data set (242 vs. 52; **Figure 3a**). This still holds true when only considering case-specific variants within constrained elements (16 vs. 1; **Figure 3a**). Even if DP dogs were removed from the analysis, *CDH2* remained one of the top candidate genes (15 vs. 1; **Figure 3b** and **Table S8**). Taking a closer look at the variants within constrained elements in *CDH2*, we observed: (i) sixteen case-only variants and only one control-only variant across all the breeds; (ii) sixteen case-only variant and six control-only variants in DP; and (iii) fifteen case-only variants and no control-only variants among all the breeds excluding DP. A

cluster of the case-only variants in intron2 coincides with a strong association signal from our GWA analysis (chr7:63867472,  $p=2.1 \times 10^{-5}$ ; **Figure 3c**).

### *CTNNA2*

*CTNNA2* was partially captured in our sequence data and was enriched with twelve case-only variants within constrained elements (**Figure 3a**). Two dogs, namely, a GS case (eight variants) and a JR case (five variants) contributed to the case-only variants found in *CTNNA2* region. Of twelve case-only variants within *CTNNA2*, two variants (GS case) were found in coding region, in which one variant (in exon12) was the same as the ancestral allele and the other (in exon13) as the human allele. An intronic variant from the same dog was found between these two exons. Of the remaining nine, five variants clustered around intron 8 and exon 8. Specifically, three variants (two JR case variants and one GS case variant) clustered within intron 8, and two variants (one JR case variant and one GS case variant) around exon8. The remaining four variants reside within intron 7 and intron 9, two of which reside within DNase1 hypersensitivity site (data not shown).

### *PGCP*

*PGCP* was enriched with sixteen case-only variants within constrained region (**Figure 3a**). The variants were identified from three dogs, namely, a SS case (six variants), a JR case (four variants), and a GS case (six variants). Of the sixteen case-only variants, one (SS case) was found within the 3'UTR and another (JR case) in exon5, in which the identified variant was the same as the ancestral allele in other mammals. We also observed a deletion in exon2 (JRT case) and an intronic variant (GS case) near exon2

(**Figure 3c**). The remaining twelve were distributed across *PGCP*, of which three failed to lift over onto hg19.

### **Text S2. Coding variants**

We surveyed the variants within protein-coding regions, including missense, nonsense, frame-shift and those located in essential splice sites. Six missense variants were detected in at least one case dog but not in any controls, two of which were predicted by Polyphen-2[2] to change protein function with high confidence (**Table S9**). Both of them were present in a SS case and were located inside *KIAA1530* and *calpain 14 (CAPN14)*. *KIAA153*, also known as *UV-stimulated scaffold protein A (UVSSA)*, is widely expressed in a multiplicity of dog tissues including the brain (unpublished data). While the protein is known to interact with nucleotide excision repair complex[3], its function in the brain has not been well studied, which makes it difficult to develop a functional assay for the variant. *CAPN14* encodes the calcium-activated neutral proteinase 14 (calpain 14), which belongs to the calpain family that is involved in a variety of cellular processes including cell division, synaptic plasticity and apoptosis[4]. Its mRNA has been detected in several dog tissues including the brain (unpublished). However, when aligning the variant's flanking sequence to the human genome, a 187b-long sequence gap was present in the codon frame of the variant, making the translation of the impact of this variant into human difficult.

## Supplemental Tables

**Table S1. Candidate associated regions identified in GWAS**

| GWAS (new)<br>87 cases + 63 controls |         | GWAS (original)<br>92 cases + 68 controls |         | Top region ( $r^2 > 0.8$ , with flanking genes) |           |                                                                                                                                                                 |
|--------------------------------------|---------|-------------------------------------------|---------|-------------------------------------------------|-----------|-----------------------------------------------------------------------------------------------------------------------------------------------------------------|
| SNP                                  | p       | SNP                                       | p       | region                                          | size (kb) | genes                                                                                                                                                           |
| chr7 63867472                        | 2.1E-05 | chr7 63867472                             | 7.6E-07 | chr7 63741207-63954411                          | 213       | <i>CDH2</i>                                                                                                                                                     |
| chr7 61865715                        | 1.6E-05 | chr7 61835240                             | 3.8E-06 | chr7 61392736-61900158                          | 507       | <i>DSC3</i>                                                                                                                                                     |
| chr34 39694895                       | 1.9E-07 |                                           |         | chr34 38431782-39772222                         | 1340      | <i>TNIK, PLD1, TMEM212, FNDC3B, GHSR, TNFSF10</i>                                                                                                               |
| chr26 39188777                       | 2.1E-06 |                                           |         | chr26 38766783-40001941                         | 1235      | <i>DKK1, PRKG1</i>                                                                                                                                              |
| chr17 27736094                       | 6.1E-06 |                                           |         | chr17 27638084-27929679                         | 292       | <i>GALNT14, CAPN14</i>                                                                                                                                          |
| chr18 56503107                       | 1.1E-05 |                                           |         | chr18 56127466-56771285                         | 644       | <i>MARK2, C11orf84, C18H11orf84, C11orf95, RTN3, ATL3, PLA2G16, HRASLS2, RARRES3, LGALS12, HRASLS5, SLC22A9, SLC22A24, SLC22A25, SLC22A10, SLC22A8, SLC22A6</i> |
| chr29 44152594                       | 1.5E-05 |                                           |         | chr29 43925364-44448160                         | 523       | <i>SDC2, PGCP, CPQ</i>                                                                                                                                          |
| chr18 48909564                       | 1.6E-05 |                                           |         | chr18 48725507-49046739                         | 321       | <i>MOB2, DUSP8, KRTAP5-11, KRTAP5-2, KRTAP5-9, KRTAP5-8, KRTAP5-3, KRTAP5-4, KRTAP5-7, KRTAP5-6, IFITM10, CTSD</i>                                              |
| chr35 18565131                       | 1.6E-05 |                                           |         | chr35 18409969-18872470                         | 463       | <i>GMPR, ATXN1</i>                                                                                                                                              |
| chr18 57375179                       | 2.4E-05 |                                           |         | chr18 57242322-57410796                         | 168       | <i>ASRGL1, SCGB1D2, SCGB1D1, SCGB2A1, INCENP</i>                                                                                                                |
| chr7 21065761                        | 3.0E-05 |                                           |         | chr7 20881499-22219043                          | 1338      | <i>EDEM3, FAM129A, RNF2, TRMT1L, SWT1, IVNS1ABP, HMCN1</i>                                                                                                      |
| chr17 58032126                       | 4.7E-05 |                                           |         | chr17 57571016-58045329                         | 474       | <i>TRIM45, VTCN1, MAN1A2, FAM46C</i>                                                                                                                            |
| chr38 21494582                       | 4.7E-05 |                                           |         | chr38 20737417-22198037                         | 1461      | <i>LRRC52, RXRG, LMX1A, PBX1</i>                                                                                                                                |
| chr7 60990261                        | 4.8E-05 |                                           |         | chr7 60919881-61225006                          | 305       | <i>TTR, DSG2, DSG3, DSG4, DSG1</i>                                                                                                                              |
| chr35 15535554                       | 4.8E-05 |                                           |         | chr35 14998490-15799243                         | 801       | <i>PHACTR1, TBC1D7</i>                                                                                                                                          |
| chr38 19918463                       | 7.0E-05 |                                           |         | chr38 19827135-20086439                         | 259       | <i>TAF1A, MIA3, AIDA, BROX, FAM177B</i>                                                                                                                         |
| chr24.29784557                       | 8.7E-05 |                                           |         | chr24 29224804-30560165                         | 1335      |                                                                                                                                                                 |

**Table S2. Enrichment analysis of GO catalog gene sets in associated regions**

| <b>TARGET</b>                                                                                    | <b>Genes<br/>in set</b> | <b>Genes<br/>in<br/>regions</b> | <b>P</b> | <b>Genes</b>                                                         |
|--------------------------------------------------------------------------------------------------|-------------------------|---------------------------------|----------|----------------------------------------------------------------------|
| GO:0045295 Gamma-catenin binding                                                                 | 12                      | 3                               | 6.9E-05  | <i>CDH2; DSC3; DSG1</i>                                              |
| GO:0004571 Mannosyl-oligosaccharide 1,2-alpha-mannosidase activity                               | 9                       | 2                               | 0.0005   | <i>EDEM3; MAN1A2</i>                                                 |
| GO:0030057 Desmosome                                                                             | 22                      | 2                               | 0.0015   | <i>DSC3; DSG2,DSG3,DSG4,DSG1</i>                                     |
| GO:0048814 Regulation of dendrite morphogenesis                                                  | 13                      | 2                               | 0.0016   | <i>TNIK; SDC2</i>                                                    |
| GO:0036170 Filamentous growth of a population of unicellular organisms in response to starvation | 25                      | 2                               | 0.0020   | <i>PLD1; MOB2</i>                                                    |
| GO:0005615 Extracellular space                                                                   | 748                     | 8                               | 0.0021   | <i>SCGB1D2,SCGB1D1; RTN3; TTR; DKK1; BPI,LBP; TNFSF10; CPQ; CTSD</i> |
| GO:0008344 Adult locomotory behavior                                                             | 41                      | 2                               | 0.0037   | <i>TRMT1L; ATXN1</i>                                                 |
| GO:0001523 Retinoid metabolic process                                                            | 48                      | 2                               | 0.0042   | <i>TTR; SDC2</i>                                                     |
| GO:0007603 Phototransduction, visible light                                                      | 50                      | 2                               | 0.0050   | <i>TTR; SDC2</i>                                                     |
| GO:0043687 Post-translational protein modification                                               | 181                     | 3                               | 0.0056   | <i>EDEM3; MAN1A2; GALNT14</i>                                        |
| GO:0051286 Cell tip                                                                              | 5                       | 2                               | 0.0071   | <i>SLC32A1; MOB2</i>                                                 |
| GO:0009267 Cellular response to starvation                                                       | 48                      | 2                               | 0.0075   | <i>PLD1; MOB2</i>                                                    |
| GO:0030447 Filamentous growth                                                                    | 56                      | 2                               | 0.0077   | <i>PLD1; MOB2</i>                                                    |
| GO:0043202 Lysosomal lumen                                                                       | 64                      | 2                               | 0.0080   | <i>SDC2; CTSD</i>                                                    |
| GO:0016339 Calcium-dependent cell-cell adhesion                                                  | 25                      | 2                               | 0.0088   | <i>CDH2; DSG1</i>                                                    |

**Table S3. The thirteen longest regions of fixation in the DP**

| chr | start    | end      | size | # genes | genes                                                                                                                                                                                                                                                                                                                                                                                                                        |
|-----|----------|----------|------|---------|------------------------------------------------------------------------------------------------------------------------------------------------------------------------------------------------------------------------------------------------------------------------------------------------------------------------------------------------------------------------------------------------------------------------------|
| 3   | 62948826 | 70302993 | 7.35 | 57      | <i>ACOX3, METTL19, TRMT44, GPR78, CPZ, HMX1, ADRA2C, LRPAP1, DOK7, HGFAC, RGS12, HTT, GRK4, NOP14, MFSD10, ADD1, SH3BP2, TNIP2, FAM193A, RNF4, ZFYVE28, MXD4, HAUS3, POLN, NAT8L, C4orf48, WHSC2, NELFA, WHSC1, LETM1, FGFR3, TACC3, TMEM129, SLBP, FAM53A, UVSSA, MAEA, FAM184B, MED28, LAP3, CLRN2, QDPR, LDB2, TAPT1, PROM1, FGFBP1, CD38, BST1, FAM200B, FBXL5, CC2D2A, C1QTNF7, CPEB2, BOD1L, BOD1L1, NKX3-2, RAB28</i> |
| 3   | 59513417 | 62897146 | 3.38 | 33      | <i>MESDC2, KIAA1199, FAM108C1, ARNT2, FAH, ZFAND6, BCL2A1, MTHFS, KIAA1024, TMED3, RASGRF1, CTSH, MORF4L1, ADAMTS7, TBC1D2B, IDH3A, ACSBG1, DNAJA4, WDR61, CRABP1, PPP2R2C, MRFAP1, S100P, BLOC1S4, KIAA0232, TBC1D14, TADA2B, GRPEL1, SORCS2, PSAPL1, AFAP1, ABLIM2, SH3TC1</i>                                                                                                                                             |
| 3   | 3548237  | 6087635  | 2.54 | 11      | <i>EPB41L4A, NREP, STARD4, CAMK4, WDR36, TSLP, SLC25A46, TMEM232, MAN2A1, PJA2, FER</i>                                                                                                                                                                                                                                                                                                                                      |
| 24  | 3013164  | 4715848  | 1.70 | 10      | <i>CST8, CST11, CSTL1, NAPB, GZF1, NXT1, CD93, THBD, SSTR4, FOXA2</i>                                                                                                                                                                                                                                                                                                                                                        |
| 31  | 7605474  | 9218454  | 1.61 | 1       | <i>GBE1</i>                                                                                                                                                                                                                                                                                                                                                                                                                  |
| 17  | 45925444 | 47203813 | 1.28 | 2       | <i>CTNNA2, LRRTM1</i>                                                                                                                                                                                                                                                                                                                                                                                                        |
| 31  | 3075862  | 4279751  | 1.20 | 6       | <i>CGGBP1, ZNF654, HTR1F, POU1F1, CHMP2B, VGLL3</i>                                                                                                                                                                                                                                                                                                                                                                          |
| 12  | 36982027 | 38147867 | 1.17 | 2       | <i>RIMS1, KCNQ5</i>                                                                                                                                                                                                                                                                                                                                                                                                          |
| 14  | 3737103  | 4832311  | 1.10 | 17      | <i>IBA57, GJC2, GUK1, MRPL55, ARF1, WNT3A, WNT9A, PRSS38, SNAP47, OR6F1, OR13G1, OR2AK2, OR2L13, OR2L3, OR2W3, TRIM58, OR11L1</i>                                                                                                                                                                                                                                                                                            |
| 2   | 62546927 | 63611219 | 1.06 | 13      | <i>BBS2, OGFOD1, NUDT21, AMFR, GNAO1, CES5A, CES1, CES1P1, SLC6A2, LPCAT2, CAPNS2, MMP2, IRX6</i>                                                                                                                                                                                                                                                                                                                            |
| 13  | 57506475 | 58481113 | 0.97 | 1       | <i>TECRL</i>                                                                                                                                                                                                                                                                                                                                                                                                                 |
| 13  | 6295550  | 7242655  | 0.95 | 6       | <i>GRHL2, NCALD, RRM2B, UBR5, ODF1, KLF10</i>                                                                                                                                                                                                                                                                                                                                                                                |
| 11  | 49214235 | 50070536 | 0.86 | 1       | <i>LINGO2</i>                                                                                                                                                                                                                                                                                                                                                                                                                |

**Table S4. 128 regions of reduced relative heterozygosity in the DP breed**

| CHR | START    | END      | GENES                                               |
|-----|----------|----------|-----------------------------------------------------|
| 2   | 19440000 | 19590000 | none                                                |
| 2   | 21780000 | 21990000 | MIR511-1, MIR511-2, SLC39A12                        |
| 2   | 80760000 | 80970000 | EIF4G3                                              |
| 3   | 66030000 | 66210000 | none                                                |
| 3   | 68820000 | 68970000 | none                                                |
| 4   | 6660000  | 6870000  | EDARADD, ERO1LB, GPR137B                            |
| 4   | 91290000 | 91440000 | ANKH                                                |
| 5   | 12930000 | 13140000 | OR8B2, OR8B3, OR8B4, OR8B8                          |
| 5   | 17160000 | 17370000 | PVRL1                                               |
| 5   | 42210000 | 42390000 | TRIM16L, ZNF286A, ZNF287, ZNF624                    |
| 5   | 45690000 | 45930000 | KCNJ12, MAP2K3                                      |
| 5   | 81840000 | 81990000 | none                                                |
| 6   | 12510000 | 12660000 | AZGP1, COPS6, ZKSCAN1, ZNF3, ZSCAN21                |
| 6   | 14100000 | 14250000 | BHLHA15, LMTK2, TECPR1                              |
| 6   | 14610000 | 14760000 | C7orf70, CYTH3, FAM220A, RAC1                       |
| 6   | 39630000 | 39900000 | SEPT12, ANKS3, FAM100A, GLYR1, MGRN1, ROGDI, ZNF500 |
| 7   | 55320000 | 55530000 | none                                                |
| 7   | 69300000 | 69450000 | ABHD3, MIB1, SNRPD1                                 |
| 8   | 9540000  | 9690000  | none                                                |
| 8   | 11910000 | 12120000 | PRKD1                                               |
| 8   | 19680000 | 19860000 | none                                                |
| 8   | 21060000 | 21240000 | none                                                |
| 8   | 25110000 | 25320000 | none                                                |
| 8   | 33330000 | 33480000 | CDKN3, CGRRF1, CNIH, GMFB                           |
| 8   | 60810000 | 61020000 | none                                                |
| 8   | 67320000 | 67500000 | C14orf49, GLRX5, SNHG10                             |
| 8   | 70860000 | 71010000 | CCDC85C, CCNK, SETD3                                |
| 8   | 71310000 | 71490000 | EML1, EVL, MIR342                                   |
| 9   | 7890000  | 8040000  | LLGL2, RECQL5, SAP30BP, TSEN54                      |
| 9   | 15450000 | 15720000 | BPTF, CEP95, SMURF2                                 |
| 9   | 16110000 | 16320000 | PITPNC1, PSMD12                                     |
| 9   | 18660000 | 18840000 | ABCA10, ABCA5, ABCA6, ABCA9                         |
| 9   | 51030000 | 51180000 | ATP2A3, CACNA1B                                     |
| 10  | 11580000 | 11730000 | IRAK3, LLPH, TMBIM4                                 |
| 10  | 31920000 | 32070000 | HMGXB4, ISX                                         |
| 11  | 6270000  | 6420000  | AGXT2L2, COL23A1, HNRNPAB, N4BP3, NHP2, RMND5B      |
| 11  | 36690000 | 36870000 | MPDZ                                                |
| 11  | 38310000 | 38490000 | FREM1                                               |
| 11  | 41850000 | 42030000 | FAM154A, HAUS6, PLIN2, RRAGA, SCARNA8               |
| 11  | 52230000 | 52380000 | none                                                |
| 12  | 14340000 | 14490000 | CNPY3, PTCRA, RPL7L1                                |
| 12  | 19500000 | 19650000 | none                                                |
| 12  | 35490000 | 35640000 | COL19A1                                             |
| 12  | 36660000 | 36930000 | LINC00472, MIR30A, MIR30C2, OGFRL1                  |
| 12  | 38220000 | 38370000 | KCNQ5, KHDC1, KHDC1L                                |
| 12  | 63780000 | 64050000 | none                                                |
| 12  | 65940000 | 66120000 | none                                                |
| 13  | 5880000  | 6030000  | ZNF706                                              |
| 13  | 45210000 | 45360000 | GABRA2, GABRG1                                      |
| 13  | 53490000 | 53700000 | none                                                |
| 13  | 61080000 | 61230000 | GNRHR, UBA6                                         |
| 14  | 48390000 | 48540000 | BBS9                                                |
| 15  | 3390000  | 3600000  | C1orf50, ERMAP, LOC100129924, SLC2A1                |
| 15  | 6870000  | 7110000  | MYCBP, RRAGC                                        |
| 15  | 16290000 | 16440000 | CMPK1, STIL                                         |
| 15  | 19950000 | 20100000 | EBNA1BP2, WDR65                                     |
| 15  | 24450000 | 24600000 | SYT1                                                |
| 15  | 28170000 | 28350000 | none                                                |
| 15  | 33930000 | 34140000 | none                                                |
| 15  | 40650000 | 40860000 | none                                                |

|    |          |          |                                                                                                    |
|----|----------|----------|----------------------------------------------------------------------------------------------------|
| 15 | 53460000 | 53730000 | ARFIP1, TIGD4, TMEM154                                                                             |
| 15 | 63900000 | 64050000 | TRIM61                                                                                             |
| 15 | 65520000 | 65790000 | SPOCK3                                                                                             |
| 16 | 56040000 | 56190000 | none                                                                                               |
| 17 | 18060000 | 18210000 | LAPTM4A, SDC1                                                                                      |
| 17 | 46440000 | 46650000 | CTNNA2                                                                                             |
| 17 | 65040000 | 65310000 | LOR, MAGI3                                                                                         |
| 18 | 7920000  | 8130000  | HPVC1                                                                                              |
| 18 | 15390000 | 15630000 | LAMB1, LAMB4, NRCAM                                                                                |
| 18 | 51570000 | 51780000 | MYEOV                                                                                              |
| 19 | 13680000 | 13830000 | none                                                                                               |
| 19 | 21390000 | 21540000 | ANXA5                                                                                              |
| 19 | 21630000 | 21780000 | QRFPR                                                                                              |
| 19 | 23460000 | 23610000 | FAM123C                                                                                            |
| 19 | 37080000 | 37230000 | DPP10                                                                                              |
| 20 | 8580000  | 8790000  | C3orf25, CAND2, H1FOO, IFT122, PLXND1, RPL32                                                       |
| 20 | 16050000 | 16260000 | ITPR1, SETMAR, SUMF1                                                                               |
| 20 | 17580000 | 17790000 | CNTN4                                                                                              |
| 20 | 20160000 | 20340000 | none                                                                                               |
| 20 | 23970000 | 24120000 | FOXP1                                                                                              |
| 20 | 32190000 | 32370000 | PTPRG                                                                                              |
| 20 | 33480000 | 33660000 | FHIT                                                                                               |
| 20 | 61020000 | 61200000 | BSG, C2CD4D, CDC34, FGF22, FSTL3, HCN2, MADCAM1, ODF3L2, POLRMT, PRSS57, RNF126, SHC2, THEG, TPGS1 |
| 21 | 51570000 | 51780000 | KIF18A, METTL15                                                                                    |
| 22 | 20250000 | 20400000 | none                                                                                               |
| 22 | 29160000 | 29340000 | none                                                                                               |
| 22 | 32220000 | 32400000 | COMMD6, LMO7, TBC1D4, UCHL3                                                                        |
| 22 | 47310000 | 47520000 | GPC6                                                                                               |
| 23 | 8850000  | 9000000  | ARPP21                                                                                             |
| 23 | 18480000 | 18630000 | none                                                                                               |
| 23 | 24480000 | 24750000 | ZNF385D                                                                                            |
| 24 | 3960000  | 4140000  | LINC00261                                                                                          |
| 24 | 10560000 | 10740000 | MACROD2                                                                                            |
| 24 | 44490000 | 44670000 | AURKA, C20orf43, CASS4, CSTF1, FAM210B, GCNT7                                                      |
| 25 | 28860000 | 29100000 | CTSB, DEFB131, DEFB134, DEFB135, DEFB136, FDF11, LOC100129216, NEIL2                               |
| 25 | 39720000 | 39900000 | ATP6V1B2, SLC18A1                                                                                  |
| 25 | 49350000 | 49500000 | AGAP1                                                                                              |
| 25 | 53250000 | 53520000 | GPC1, MIR149, MYEOV2, OTOS, PP14571                                                                |
| 26 | 3630000  | 3780000  | GALNT9, LOC100130238                                                                               |
| 26 | 4260000  | 4410000  | GPR133                                                                                             |
| 26 | 24270000 | 24570000 | MN1, PITPNB, TTC28, TTC28-AS1                                                                      |
| 26 | 33300000 | 33510000 | CCDC74A, CCDC74B, KLHL22, MED15, MZT2A, MZT2B, SCARF2, SMPD4, TUBA3C                               |
| 26 | 33990000 | 34200000 | MAPK1, PPIL2, YPEL1                                                                                |
| 26 | 38880000 | 39030000 | PRKG1                                                                                              |
| 26 | 40800000 | 41010000 | ATAD1, KLLN, PAPSS2, PTEN                                                                          |
| 27 | 3780000  | 3960000  | GPR84, GTSF1, ITGA5, NCKAP1L, PDE1B, ZNF385A                                                       |
| 27 | 21480000 | 21660000 | ERGIC2, OVCH1, TMTC1                                                                               |
| 27 | 37260000 | 37440000 | ETV6                                                                                               |
| 28 | 35730000 | 36000000 | none                                                                                               |
| 28 | 36330000 | 36480000 | CHST15, CPXM2                                                                                      |
| 28 | 39990000 | 40140000 | none                                                                                               |
| 29 | 19080000 | 19230000 | C8orf46, MYBL1, VCIPI1                                                                             |
| 29 | 20910000 | 21060000 | C8orf34                                                                                            |
| 29 | 32580000 | 32730000 | none                                                                                               |
| 29 | 33600000 | 33840000 | RALYL                                                                                              |
| 30 | 14850000 | 15060000 | PLDN, SLC30A4, SQRDL                                                                               |
| 30 | 22650000 | 22800000 | UNC13C                                                                                             |
| 30 | 37710000 | 37890000 | CT62, LRRRC49, THSD4                                                                               |
| 32 | 14340000 | 14490000 | ABCG2, PKD2                                                                                        |
| 33 | 12600000 | 12780000 | none                                                                                               |
| 33 | 33060000 | 33210000 | DLG1                                                                                               |
| 34 | 10110000 | 10260000 | LOC255167, NSUN2, SRD5A1, UBE2QL1                                                                  |



|    |          |          |                                  |
|----|----------|----------|----------------------------------|
| 34 | 16830000 | 17010000 | <i>CCDC39, TTC14</i>             |
| 34 | 32670000 | 32820000 | none                             |
| 36 | 7200000  | 7350000  | <i>CCDC148, PKP4</i>             |
| 36 | 21270000 | 21510000 | <i>CIR1, GPR155, OLA1, SCRN3</i> |
| 38 | 19470000 | 19740000 | none                             |
| 35 | 3240000  | 3510000  | none                             |

**Table S5. Sequencing array design, including GWAS regions and fixed regions that overlap between the breeds predisposed with OCD.**

| region type | region                  | size (kb) | targeting strategy         | total target (kb) | fraction targeted | genes targeted                                                                                                                                                                                 |
|-------------|-------------------------|-----------|----------------------------|-------------------|-------------------|------------------------------------------------------------------------------------------------------------------------------------------------------------------------------------------------|
| GWAS        | chr7 63733949-63968500  | 235       | all                        | 235               | 1.00              | <i>CDH2</i>                                                                                                                                                                                    |
| GWAS        | chr7 61598949-61916823  | 318       | all                        | 318               | 1.00              | none                                                                                                                                                                                           |
| GWAS        | chr34 38914699-39816833 | 902       | all                        | 902               | 1.00              | <i>PLD1, TMEM212, FNDC3B, GHSR, TNFSF10</i>                                                                                                                                                    |
| GWAS        | chr17 27631854-27926018 | 294       | all                        | 294               | 1.00              | <i>GALNT14, CAPN14</i>                                                                                                                                                                         |
| GWAS        | chr18 56382749-56898210 | 515       | genes & conserved elements | 24                | 0.05              | <i>ATL3, PLA2G16, LGALS12, HRASLS5, SLC22A8, SLC22A6, CHRM1, SLC3A2, SNHG1, SNORD30, SNORD31, SNORD22, WDR74, STX5</i>                                                                         |
| GWAS        | chr29 44099250-44611012 | 512       | all                        | 512               | 1.00              | <i>PGCP, CPQ, TSPYL5</i>                                                                                                                                                                       |
| GWAS        | chr18 48718949-49010600 | 292       | all                        | 292               | 1.00              | <i>MOB2, DUSP8, KRTAP5-11, KRTAP5-2, KRTAP5-9, KRTAP5-8, KRTAP5-3, KRTAP5-4, KRTAP5-7</i>                                                                                                      |
| GWAS        | chr35 18464094-18881027 | 417       | all                        | 417               | 1.00              | <i>ATXN1</i>                                                                                                                                                                                   |
| GWAS        | chr18 57118970-57451000 | 332       | all                        | 332               | 1.00              | <i>AHNAK, SCGB1A1, ASRGL1, SCGB1D2, SCGB1D1, SCGB2A1, INCENP</i>                                                                                                                               |
| GWAS        | chr7 20988159-21407321  | 419       | genes & conserved elements | 20                | 0.05              | <i>FAM129A, RNF2, TRMT1L, SWT1, IVNS1ABP</i>                                                                                                                                                   |
| GWAS        | chr35 15191960-15797327 | 605       | all                        | 605               | 1.00              | <i>PHACTR1, TBC1D7</i>                                                                                                                                                                         |
| FIXED       | chr3 3485979-6250329    | 2764      | combined*                  | 1366              | 0.49              | <i>EPB41L4A, NREP, STARD4, CAMK4, WDR36, TSLP, SLC25A46, TMEM232, MAN2A1, PJA2, FER</i>                                                                                                        |
| FIXED       | chr3 61344672-62453220  | 1109      | genes & conserved elements | 23                | 0.02              | <i>PPP2R2C, MRFAP1, BLOC1S4, CNO, KIAA0232, TBC1D14, CCDC96, TADA2B, GRPEL1, SORCS2</i>                                                                                                        |
| FIXED       | chr3 64150954-65507021  | 1356      | genes & conserved elements | 120               | 0.09              | <i>NOP14, C4orf10, MFSD10, ADD1, SH3BP2, TNIP2, FAM193A, RNF4, ZFYVE28, MXD4, HAUS3, POLN, NAT8L, NELFA, WHSC2, WHSC1, SCARNA22, LETM1, FGFR3, TACC3, TMEM129, SLBP, UVSSA, KIAA1530, MAEA</i> |
| FIXED       | chr17 46107254-46996631 | 889       | combined*                  | 148               | 0.17              | <i>CTNNA2, LRRTM1</i>                                                                                                                                                                          |
| FIXED       | chr19 12898854-13844607 | 946       | combined*                  | 158               | 0.17              | none                                                                                                                                                                                           |

\* see supplementary figure 1

**Table S6. Targeted sequencing array design**

| CHR | START    | END      | TYPE  | SIZE (KB) |
|-----|----------|----------|-------|-----------|
| 34  | 38914699 | 39816833 | GWAS  | 902.134   |
| 35  | 15191960 | 15797327 | GWAS  | 605.367   |
| 29  | 44099250 | 44611012 | GWAS  | 511.762   |
| 35  | 18464094 | 18881027 | GWAS  | 416.933   |
| 18  | 57118970 | 57451000 | GWAS  | 332.030   |
| 7   | 61598949 | 61916823 | GWAS  | 317.874   |
| 17  | 27631854 | 27926018 | GWAS  | 294.164   |
| 18  | 48718949 | 49010600 | GWAS  | 291.651   |
| 7   | 63733949 | 63968500 | GWAS  | 234.551   |
| 18  | 56469261 | 56472729 | GWAS  | 3.468     |
| 18  | 56887849 | 56890630 | GWAS  | 2.781     |
| 7   | 21401554 | 21404020 | GWAS  | 2.466     |
| 7   | 21242164 | 21244600 | GWAS  | 2.436     |
| 7   | 21396050 | 21398329 | GWAS  | 2.279     |
| 7   | 21405399 | 21407321 | GWAS  | 1.922     |
| 18  | 56822053 | 56823731 | GWAS  | 1.678     |
| 18  | 56896569 | 56898210 | GWAS  | 1.641     |
| 7   | 21236971 | 21238333 | GWAS  | 1.362     |
| 18  | 56766349 | 56767618 | GWAS  | 1.269     |
| 7   | 21276449 | 21277631 | GWAS  | 1.182     |
| 18  | 56385069 | 56386232 | GWAS  | 1.163     |
| 18  | 56465860 | 56466939 | GWAS  | 1.079     |
| 7   | 21007671 | 21008728 | GWAS  | 1.057     |
| 18  | 56870850 | 56871900 | GWAS  | 1.050     |
| 18  | 56810561 | 56811530 | GWAS  | 0.969     |
| 18  | 56764362 | 56765216 | GWAS  | 0.854     |
| 7   | 21394299 | 21395123 | GWAS  | 0.824     |
| 18  | 56884754 | 56885435 | GWAS  | 0.681     |
| 18  | 56845149 | 56845828 | GWAS  | 0.679     |
| 18  | 56754353 | 56755020 | GWAS  | 0.667     |
| 7   | 21257973 | 21258622 | GWAS  | 0.649     |
| 18  | 56768452 | 56769100 | GWAS  | 0.648     |
| 18  | 56891749 | 56892340 | GWAS  | 0.591     |
| 18  | 56418151 | 56418731 | GWAS  | 0.580     |
| 18  | 56382749 | 56383236 | GWAS  | 0.487     |
| 7   | 21071954 | 21072437 | GWAS  | 0.483     |
| 18  | 56808653 | 56809135 | GWAS  | 0.482     |
| 7   | 21273754 | 21274225 | GWAS  | 0.471     |
| 7   | 21069049 | 21069507 | GWAS  | 0.458     |
| 18  | 56737363 | 56737819 | GWAS  | 0.456     |
| 7   | 20994254 | 20994709 | GWAS  | 0.455     |
| 18  | 56488149 | 56488600 | GWAS  | 0.451     |
| 7   | 20997879 | 20998328 | GWAS  | 0.449     |
| 7   | 20988159 | 20988600 | GWAS  | 0.441     |
| 18  | 56411199 | 56411623 | GWAS  | 0.424     |
| 7   | 21014449 | 21014833 | GWAS  | 0.384     |
| 18  | 56763254 | 56763629 | GWAS  | 0.375     |
| 7   | 21386461 | 21386831 | GWAS  | 0.370     |
| 18  | 56486069 | 56486438 | GWAS  | 0.369     |
| 7   | 21281152 | 21281520 | GWAS  | 0.368     |
| 18  | 56748854 | 56749222 | GWAS  | 0.368     |
| 7   | 21059461 | 21059826 | GWAS  | 0.365     |
| 7   | 21234149 | 21234513 | GWAS  | 0.364     |
| 18  | 56425754 | 56426115 | GWAS  | 0.361     |
| 7   | 21263454 | 21263800 | GWAS  | 0.346     |
| 7   | 21320254 | 21320600 | GWAS  | 0.346     |
| 7   | 20989963 | 20990300 | GWAS  | 0.337     |
| 3   | 3624353  | 4029207  | fixed | 404.854   |
| 3   | 5942854  | 6250329  | fixed | 307.475   |

|    |          |          |       |         |
|----|----------|----------|-------|---------|
| 3  | 4800199  | 5084936  | fixed | 284.737 |
| 3  | 4039899  | 4270130  | fixed | 230.231 |
| 19 | 13514749 | 13656717 | fixed | 141.968 |
| 17 | 46660152 | 46762926 | fixed | 102.774 |
| 3  | 4593549  | 4695524  | fixed | 101.975 |
| 17 | 46457659 | 46478917 | fixed | 21.258  |
| 19 | 12898854 | 12906100 | fixed | 7.246   |
| 3  | 65129750 | 65135529 | fixed | 5.779   |
| 3  | 64154154 | 64159336 | fixed | 5.182   |
| 3  | 64187752 | 64192629 | fixed | 4.877   |
| 3  | 61779950 | 61783514 | fixed | 3.564   |
| 19 | 13691849 | 13695100 | fixed | 3.251   |
| 3  | 64987199 | 64990231 | fixed | 3.032   |
| 17 | 46107254 | 46110131 | fixed | 2.877   |
| 3  | 65118699 | 65121341 | fixed | 2.642   |
| 17 | 46899874 | 46902426 | fixed | 2.552   |
| 3  | 65494150 | 65496437 | fixed | 2.287   |
| 3  | 64275154 | 64277432 | fixed | 2.278   |
| 3  | 65003959 | 65006137 | fixed | 2.178   |
| 3  | 64160151 | 64162235 | fixed | 2.084   |
| 3  | 4368049  | 4370100  | fixed | 2.051   |
| 3  | 65101749 | 65103728 | fixed | 1.979   |
| 3  | 65187899 | 65189826 | fixed | 1.927   |
| 3  | 64737074 | 64739000 | fixed | 1.926   |
| 3  | 61938584 | 61940505 | fixed | 1.921   |
| 3  | 65473753 | 65475637 | fixed | 1.884   |
| 3  | 64280654 | 64282535 | fixed | 1.881   |
| 3  | 64394264 | 64396030 | fixed | 1.766   |
| 3  | 64767471 | 64769212 | fixed | 1.741   |
| 3  | 64980049 | 64981740 | fixed | 1.691   |
| 3  | 65476749 | 65478423 | fixed | 1.674   |
| 3  | 65505349 | 65507021 | fixed | 1.672   |
| 3  | 64543459 | 64545130 | fixed | 1.671   |
| 3  | 64385051 | 64386719 | fixed | 1.668   |
| 3  | 65213174 | 65214819 | fixed | 1.645   |
| 3  | 64997179 | 64998811 | fixed | 1.632   |
| 3  | 4356282  | 4357900  | fixed | 1.618   |
| 3  | 5681049  | 5682612  | fixed | 1.563   |
| 3  | 65158161 | 65159721 | fixed | 1.56    |
| 3  | 65001570 | 65003127 | fixed | 1.557   |
| 3  | 64197554 | 64199027 | fixed | 1.473   |
| 17 | 46538449 | 46539835 | fixed | 1.386   |
| 3  | 64587063 | 64588421 | fixed | 1.358   |
| 3  | 61896649 | 61898000 | fixed | 1.351   |
| 3  | 65007753 | 65009100 | fixed | 1.347   |
| 3  | 65031054 | 65032400 | fixed | 1.346   |
| 3  | 64436681 | 64438000 | fixed | 1.319   |
| 3  | 64173464 | 64174733 | fixed | 1.269   |
| 3  | 64351454 | 64352716 | fixed | 1.262   |
| 3  | 3536249  | 3537500  | fixed | 1.251   |
| 3  | 5470879  | 5472121  | fixed | 1.242   |
| 17 | 46657664 | 46658836 | fixed | 1.172   |
| 3  | 64597554 | 64598722 | fixed | 1.168   |
| 3  | 61900549 | 61901712 | fixed | 1.163   |
| 3  | 64926152 | 64927310 | fixed | 1.158   |
| 3  | 64710161 | 64711300 | fixed | 1.139   |
| 3  | 64179753 | 64180841 | fixed | 1.088   |
| 3  | 65013049 | 65014135 | fixed | 1.086   |
| 3  | 5227459  | 5228534  | fixed | 1.075   |
| 3  | 64363460 | 64364519 | fixed | 1.059   |
| 3  | 64831649 | 64832704 | fixed | 1.055   |
| 3  | 64381849 | 64382900 | fixed | 1.051   |
| 17 | 46578470 | 46579514 | fixed | 1.044   |
| 3  | 3500174  | 3501132  | fixed | 0.958   |

|    |          |          |       |       |
|----|----------|----------|-------|-------|
| 3  | 61823363 | 61824300 | fixed | 0.937 |
| 3  | 64169564 | 64170500 | fixed | 0.936 |
| 3  | 64164299 | 64165214 | fixed | 0.915 |
| 3  | 5676349  | 5677232  | fixed | 0.883 |
| 3  | 64823451 | 64824329 | fixed | 0.878 |
| 3  | 65358549 | 65359424 | fixed | 0.875 |
| 3  | 65486559 | 65487434 | fixed | 0.875 |
| 3  | 4589561  | 4590435  | fixed | 0.874 |
| 17 | 46896850 | 46897722 | fixed | 0.872 |
| 17 | 46448254 | 46449123 | fixed | 0.869 |
| 3  | 65112561 | 65113404 | fixed | 0.843 |
| 3  | 64278559 | 64279400 | fixed | 0.841 |
| 19 | 13696284 | 13697114 | fixed | 0.83  |
| 3  | 64412053 | 64412833 | fixed | 0.78  |
| 3  | 65484959 | 65485728 | fixed | 0.769 |
| 17 | 46269854 | 46270622 | fixed | 0.768 |
| 17 | 46607349 | 46608100 | fixed | 0.751 |
| 17 | 46790949 | 46791700 | fixed | 0.751 |
| 3  | 5559262  | 5560005  | fixed | 0.743 |
| 3  | 64200669 | 64201412 | fixed | 0.743 |
| 3  | 5177062  | 5177800  | fixed | 0.738 |
| 3  | 65046564 | 65047300 | fixed | 0.736 |
| 3  | 61796051 | 61796736 | fixed | 0.685 |
| 3  | 61580050 | 61580732 | fixed | 0.682 |
| 17 | 46995949 | 46996631 | fixed | 0.682 |
| 3  | 61944552 | 61945228 | fixed | 0.676 |
| 3  | 65458254 | 65458928 | fixed | 0.674 |
| 3  | 64409259 | 64409932 | fixed | 0.673 |
| 3  | 64928054 | 64928727 | fixed | 0.673 |
| 17 | 46974154 | 46974827 | fixed | 0.673 |
| 3  | 65447949 | 65448619 | fixed | 0.67  |
| 3  | 4340753  | 4341420  | fixed | 0.667 |
| 3  | 65327449 | 65328109 | fixed | 0.66  |
| 3  | 65289059 | 65289709 | fixed | 0.65  |
| 3  | 64982563 | 64983211 | fixed | 0.648 |
| 17 | 46277699 | 46278300 | fixed | 0.601 |
| 19 | 13326599 | 13327200 | fixed | 0.601 |
| 3  | 65491850 | 65492437 | fixed | 0.587 |
| 3  | 61912849 | 61913433 | fixed | 0.584 |
| 17 | 46644954 | 46645535 | fixed | 0.581 |
| 17 | 46236451 | 46237031 | fixed | 0.58  |
| 3  | 61746051 | 61746627 | fixed | 0.576 |
| 3  | 5640153  | 5640728  | fixed | 0.575 |
| 19 | 13445451 | 13446024 | fixed | 0.573 |
| 19 | 13834251 | 13834824 | fixed | 0.573 |
| 3  | 64433260 | 64433829 | fixed | 0.569 |
| 3  | 61344672 | 61345234 | fixed | 0.562 |
| 3  | 61925553 | 61926115 | fixed | 0.562 |
| 19 | 13070051 | 13070613 | fixed | 0.562 |
| 3  | 61642472 | 61643033 | fixed | 0.561 |
| 3  | 65325954 | 65326506 | fixed | 0.552 |
| 3  | 64770749 | 64771300 | fixed | 0.551 |
| 3  | 65203953 | 65204504 | fixed | 0.551 |
| 3  | 65323364 | 65323914 | fixed | 0.55  |
| 3  | 64392551 | 64393100 | fixed | 0.549 |
| 3  | 65099872 | 65100419 | fixed | 0.547 |
| 17 | 46568061 | 46568608 | fixed | 0.547 |
| 3  | 65350564 | 65351109 | fixed | 0.545 |
| 17 | 46924179 | 46924723 | fixed | 0.544 |
| 17 | 46961669 | 46962212 | fixed | 0.543 |
| 3  | 5548481  | 5549022  | fixed | 0.541 |
| 3  | 64177995 | 64178534 | fixed | 0.539 |
| 3  | 61556699 | 61557200 | fixed | 0.501 |
| 17 | 46819650 | 46820141 | fixed | 0.491 |

|    |          |          |       |       |
|----|----------|----------|-------|-------|
| 3  | 64283550 | 64284037 | fixed | 0.487 |
| 3  | 65020049 | 65020536 | fixed | 0.487 |
| 3  | 5243149  | 5243635  | fixed | 0.486 |
| 3  | 64975649 | 64976135 | fixed | 0.486 |
| 17 | 46583049 | 46583534 | fixed | 0.485 |
| 3  | 5225549  | 5226033  | fixed | 0.484 |
| 17 | 46855151 | 46855635 | fixed | 0.484 |
| 3  | 3494351  | 3494834  | fixed | 0.483 |
| 3  | 5280349  | 5280832  | fixed | 0.483 |
| 3  | 64757551 | 64758034 | fixed | 0.483 |
| 3  | 4343553  | 4344035  | fixed | 0.482 |
| 3  | 64403951 | 64404433 | fixed | 0.482 |
| 17 | 46872152 | 46872634 | fixed | 0.482 |
| 3  | 5345550  | 5346030  | fixed | 0.48  |
| 3  | 64681752 | 64682232 | fixed | 0.48  |
| 3  | 64704254 | 64704734 | fixed | 0.48  |
| 3  | 5637754  | 5638233  | fixed | 0.479 |
| 3  | 5649554  | 5650031  | fixed | 0.477 |
| 3  | 61391852 | 61392328 | fixed | 0.476 |
| 3  | 64182852 | 64183328 | fixed | 0.476 |
| 3  | 65373251 | 65373727 | fixed | 0.476 |
| 3  | 5207750  | 5208223  | fixed | 0.473 |
| 3  | 64284852 | 64285325 | fixed | 0.473 |
| 3  | 64977060 | 64977533 | fixed | 0.473 |
| 3  | 3518752  | 3519224  | fixed | 0.472 |
| 3  | 5359764  | 5360236  | fixed | 0.472 |
| 3  | 65210364 | 65210836 | fixed | 0.472 |
| 17 | 46613351 | 46613823 | fixed | 0.472 |
| 3  | 5773349  | 5773820  | fixed | 0.471 |
| 3  | 61890053 | 61890524 | fixed | 0.471 |
| 3  | 65481052 | 65481523 | fixed | 0.471 |
| 17 | 46800159 | 46800629 | fixed | 0.47  |
| 3  | 3495562  | 3496031  | fixed | 0.469 |
| 3  | 5857761  | 5858229  | fixed | 0.468 |
| 3  | 64218252 | 64218719 | fixed | 0.467 |
| 3  | 5165064  | 5165530  | fixed | 0.466 |
| 3  | 5304549  | 5305015  | fixed | 0.466 |
| 19 | 13680154 | 13680620 | fixed | 0.466 |
| 3  | 61552354 | 61552819 | fixed | 0.465 |
| 3  | 65200450 | 65200914 | fixed | 0.464 |
| 3  | 65343754 | 65344218 | fixed | 0.464 |
| 17 | 46626649 | 46627113 | fixed | 0.464 |
| 3  | 5903654  | 5904116  | fixed | 0.462 |
| 19 | 13710753 | 13711215 | fixed | 0.462 |
| 3  | 64168051 | 64168512 | fixed | 0.461 |
| 17 | 46547854 | 46548314 | fixed | 0.46  |
| 19 | 13267059 | 13267519 | fixed | 0.46  |
| 3  | 64462951 | 64463409 | fixed | 0.458 |
| 3  | 5408473  | 5408929  | fixed | 0.456 |
| 3  | 5315864  | 5316318  | fixed | 0.454 |
| 3  | 64781249 | 64781703 | fixed | 0.454 |
| 3  | 65117354 | 65117806 | fixed | 0.452 |
| 3  | 64862549 | 64863000 | fixed | 0.451 |
| 19 | 13287449 | 13287900 | fixed | 0.451 |
| 3  | 4393763  | 4394211  | fixed | 0.448 |
| 3  | 5403653  | 5404100  | fixed | 0.447 |
| 3  | 61367984 | 61368431 | fixed | 0.447 |
| 3  | 64206653 | 64207100 | fixed | 0.447 |
| 3  | 64692260 | 64692707 | fixed | 0.447 |
| 3  | 64930853 | 64931300 | fixed | 0.447 |
| 3  | 4337554  | 4338000  | fixed | 0.446 |
| 3  | 61764354 | 61764800 | fixed | 0.446 |
| 3  | 64758794 | 64759240 | fixed | 0.446 |
| 3  | 5318759  | 5319200  | fixed | 0.441 |

|    |          |          |       |       |
|----|----------|----------|-------|-------|
| 3  | 65148959 | 65149400 | fixed | 0.441 |
| 3  | 5301660  | 5302100  | fixed | 0.44  |
| 3  | 65022999 | 65023438 | fixed | 0.439 |
| 3  | 64541899 | 64542337 | fixed | 0.438 |
| 3  | 5667099  | 5667533  | fixed | 0.434 |
| 3  | 61384269 | 61384701 | fixed | 0.432 |
| 3  | 5327670  | 5328100  | fixed | 0.43  |
| 3  | 5661899  | 5662327  | fixed | 0.428 |
| 3  | 64779199 | 64779626 | fixed | 0.427 |
| 17 | 46850683 | 46851105 | fixed | 0.422 |
| 3  | 4374799  | 4375219  | fixed | 0.42  |
| 3  | 5753099  | 5753517  | fixed | 0.418 |
| 3  | 64213299 | 64213708 | fixed | 0.409 |
| 3  | 65043899 | 65044300 | fixed | 0.401 |
| 3  | 61788951 | 61789339 | fixed | 0.388 |
| 3  | 65472051 | 65472435 | fixed | 0.384 |
| 3  | 65483649 | 65484033 | fixed | 0.384 |
| 3  | 61777850 | 61778232 | fixed | 0.382 |
| 3  | 65000250 | 65000631 | fixed | 0.381 |
| 3  | 64354652 | 64355032 | fixed | 0.38  |
| 3  | 64421654 | 64422034 | fixed | 0.38  |
| 3  | 64914249 | 64914628 | fixed | 0.379 |
| 3  | 65017651 | 65018028 | fixed | 0.377 |
| 3  | 3544254  | 3544629  | fixed | 0.375 |
| 3  | 61859564 | 61859939 | fixed | 0.375 |
| 3  | 61892254 | 61892629 | fixed | 0.375 |
| 17 | 46876449 | 46876824 | fixed | 0.375 |
| 3  | 61886350 | 61886724 | fixed | 0.374 |
| 3  | 62438564 | 62438938 | fixed | 0.374 |
| 3  | 4345949  | 4346321  | fixed | 0.372 |
| 3  | 4380250  | 4380622  | fixed | 0.372 |
| 3  | 64755951 | 64756323 | fixed | 0.372 |
| 3  | 4366752  | 4367123  | fixed | 0.371 |
| 3  | 62452849 | 62453220 | fixed | 0.371 |
| 3  | 64556961 | 64557332 | fixed | 0.371 |
| 17 | 46808849 | 46809220 | fixed | 0.371 |
| 3  | 64601763 | 64602133 | fixed | 0.37  |
| 3  | 61357859 | 61358228 | fixed | 0.369 |
| 3  | 61389052 | 61389421 | fixed | 0.369 |
| 3  | 64690270 | 64690639 | fixed | 0.369 |
| 3  | 3572459  | 3572827  | fixed | 0.368 |
| 3  | 61888659 | 61889027 | fixed | 0.368 |
| 3  | 64559053 | 64559421 | fixed | 0.368 |
| 3  | 4353349  | 4353716  | fixed | 0.367 |
| 3  | 5400551  | 5400918  | fixed | 0.367 |
| 3  | 61776649 | 61777016 | fixed | 0.367 |
| 3  | 4376354  | 4376719  | fixed | 0.365 |
| 3  | 5679059  | 5679424  | fixed | 0.365 |
| 3  | 64911473 | 64911836 | fixed | 0.363 |
| 3  | 64150954 | 64151316 | fixed | 0.362 |
| 3  | 64427049 | 64427408 | fixed | 0.359 |
| 3  | 64746459 | 64746818 | fixed | 0.359 |
| 19 | 13049264 | 13049623 | fixed | 0.359 |
| 3  | 65164949 | 65165307 | fixed | 0.358 |
| 17 | 46781173 | 46781531 | fixed | 0.358 |
| 3  | 4372864  | 4373221  | fixed | 0.357 |
| 3  | 62221471 | 62221828 | fixed | 0.357 |
| 3  | 65216154 | 65216511 | fixed | 0.357 |
| 3  | 61394053 | 61394409 | fixed | 0.356 |
| 3  | 64413973 | 64414328 | fixed | 0.355 |
| 3  | 56197650 | 56198004 | fixed | 0.354 |
| 3  | 3512864  | 3513217  | fixed | 0.353 |
| 3  | 64166354 | 64166707 | fixed | 0.353 |
| 3  | 3485979  | 3486331  | fixed | 0.352 |

|    |          |          |       |       |
|----|----------|----------|-------|-------|
| 19 | 13797554 | 13797906 | fixed | 0.352 |
| 3  | 5362549  | 5362900  | fixed | 0.351 |
| 3  | 5754471  | 5754822  | fixed | 0.351 |
| 17 | 46617150 | 46617500 | fixed | 0.35  |
| 3  | 4592551  | 4592900  | fixed | 0.349 |
| 3  | 64750451 | 64750800 | fixed | 0.349 |
| 3  | 3552179  | 3552526  | fixed | 0.347 |
| 3  | 3568553  | 3568900  | fixed | 0.347 |
| 3  | 5245853  | 5246200  | fixed | 0.347 |
| 3  | 5229654  | 5230000  | fixed | 0.346 |
| 3  | 62315489 | 62315835 | fixed | 0.346 |
| 3  | 65277054 | 65277400 | fixed | 0.346 |
| 3  | 5235759  | 5236101  | fixed | 0.342 |
| 3  | 3498362  | 3498703  | fixed | 0.341 |
| 3  | 64978383 | 64978723 | fixed | 0.34  |
| 3  | 64735070 | 64735409 | fixed | 0.339 |
| 3  | 61798399 | 61798734 | fixed | 0.335 |
| 3  | 65110699 | 65111033 | fixed | 0.334 |
| 3  | 5311489  | 5311822  | fixed | 0.333 |
| 3  | 61904474 | 61904807 | fixed | 0.333 |
| 3  | 65128491 | 65128824 | fixed | 0.333 |
| 3  | 5901169  | 5901500  | fixed | 0.331 |
| 3  | 65016269 | 65016600 | fixed | 0.331 |
| 3  | 64373284 | 64373600 | fixed | 0.316 |
| 19 | 13844352 | 13844607 | fixed | 0.255 |
| 3  | 61916864 | 61917100 | fixed | 0.236 |



**Table S7. Sequencing statistics**

| <b>Sample ID</b> | <b>Unique Bases Aligned</b> | <b>On Target Bases</b> | <b>Mean Target Coverage</b> | <b>PCT of Target Bases with coverage<math>\geq</math>2x</b> | <b>PCT of Target Bases with coverage<math>\geq</math>20x</b> |
|------------------|-----------------------------|------------------------|-----------------------------|-------------------------------------------------------------|--------------------------------------------------------------|
| DP CASE 15237    | 1,139,683,488               | 344,896,305            | 69.7                        | 99.3                                                        | 90.8                                                         |
| DP CASE 15255    | 1,086,228,716               | 412,287,216            | 83.2                        | 99.4                                                        | 94.2                                                         |
| DP CASE 15259    | 1,110,107,291               | 429,179,317            | 86.5                        | 99.5                                                        | 94.1                                                         |
| DP CASE 15260    | 951,139,666                 | 282,485,917            | 57.1                        | 99.2                                                        | 85.8                                                         |
| DP CONTROL 15227 | 1,154,846,994               | 443,969,022            | 89.6                        | 99.3                                                        | 94.4                                                         |
| DP CONTROL 15253 | 1,050,532,650               | 387,532,268            | 78.2                        | 99.3                                                        | 93.2                                                         |
| DP CONTROL 15254 | 1,143,518,339               | 436,687,467            | 88.0                        | 99.5                                                        | 94.1                                                         |
| DP CONTROL 15262 | 945,386,032                 | 340,943,650            | 68.9                        | 99.0                                                        | 88.6                                                         |
| GS CASE 5913     | 1,133,632,267               | 312,071,917            | 63.0                        | 99.4                                                        | 91.3                                                         |
| GS CASE 5990     | 1,162,734,835               | 330,699,135            | 66.8                        | 99.2                                                        | 90.8                                                         |
| GS CONTROL 2722  | 910,366,662                 | 385,183,461            | 77.7                        | 99.5                                                        | 93.5                                                         |
| GS CONTROL 5989  | 948,552,788                 | 406,781,333            | 82.0                        | 99.5                                                        | 94.5                                                         |
| JR CASE 3094     | 1,267,941,716               | 368,157,308            | 74.3                        | 99.4                                                        | 92.1                                                         |
| JR CONTROL 205   | 1,062,769,474               | 305,843,637            | 61.7                        | 99.3                                                        | 89.4                                                         |
| SS CASE 5991     | 974,962,641                 | 419,839,514            | 84.7                        | 99.5                                                        | 95.0                                                         |
| SS CONTROL 1737  | 945,271,757                 | 405,413,251            | 81.7                        | 99.5                                                        | 94.6                                                         |

**Table S8. Variants detected in each individual.** Variants were detected through GATK pipeline. All the samples were genotyped using Illumina CanineHD BeadChip to validate the SNP call from sequencing data.

| Sample ID        | SNPs  | Insertions | Deletions | Variants | Ti/Tv | SNP Chip Concordance (%) |
|------------------|-------|------------|-----------|----------|-------|--------------------------|
| DP CASE 15237    | 10757 | 1815       | 2533      | 15105    | 2.58  | 99.0                     |
| DP CASE 15255    | 12211 | 1993       | 2869      | 17073    | 2.66  | 99.7                     |
| DP CASE 15259    | 10926 | 1839       | 2640      | 15405    | 2.66  | 99.7                     |
| DP CASE 15260    | 9063  | 1619       | 2254      | 12936    | 2.57  | 99.0                     |
| DP CONTROL 15227 | 11333 | 1902       | 2748      | 15983    | 2.68  | 99.7                     |
| DP CONTROL 15253 | 11399 | 1903       | 2753      | 16055    | 2.61  | 99.2                     |
| DP CONTROL 15254 | 9458  | 1713       | 2524      | 13695    | 2.57  | 99.5                     |
| DP CONTROL 15262 | 10803 | 1830       | 2672      | 15305    | 2.6   | 99.5                     |
| GS CASE 5913     | 12399 | 2045       | 2740      | 17184    | 2.56  | 99.7                     |
| GS CASE 5990     | 11330 | 1861       | 2613      | 15804    | 2.59  | 99.5                     |
| GS CONTROL 2722  | 11100 | 1895       | 2675      | 15670    | 2.57  | 99.7                     |
| GS CONTROL 5989  | 10464 | 1825       | 2648      | 14937    | 2.57  | 99.5                     |
| JR CASE 3094     | 12617 | 2048       | 2744      | 17409    | 2.62  | 99.2                     |
| JR CONTROL 205   | 11769 | 1929       | 2703      | 16401    | 2.63  | 97.2                     |
| SS CASE 5991     | 10129 | 1787       | 2599      | 14515    | 2.55  | 99.5                     |
| SS CONTROL 1737  | 11617 | 2061       | 2872      | 16550    | 2.55  | 93.7                     |

**Table S9. Case-/Control- Only Variants in Each Dog.** All Unique Variants: the counts of variants that are present in any case but not any control for CASE sub-table and vice versa for CONTROL sub-table; Conserved Unique Variants: variants from All Unique Variants column that are within conserved elements. P-values were calculated by paired one-sided Wilcoxon signed rank test; P-value\* excluded the lower-quality Shetland Sheepdog pairs. Sample names include breed as DP (Doberman pinscher), SS (Shetland Sheepdog), JR (Jack Russell terrier) and GS (German shepherd).

|                       | All Unique Variants | Conserved Unique Variants | Conserved Unique noncoding |
|-----------------------|---------------------|---------------------------|----------------------------|
| <b><i>CASE</i></b>    |                     |                           |                            |
| DP 15237              | 233                 | 12                        | 12                         |
| DP 15259              | 80                  | 6                         | 4                          |
| DP 15255              | 426                 | 19                        | 19                         |
| DP 15260              | 290                 | 15                        | 15                         |
| SS 5991               | 437                 | 27                        | 14                         |
| JR 3094               | 966                 | 47                        | 42                         |
| GS 5913               | 383                 | 14                        | 13                         |
| GS 5990               | 422                 | 26                        | 23                         |
| <b><i>CONTROL</i></b> |                     |                           |                            |
| DP 15227              | 156                 | 3                         | 3                          |
| DP 15253              | 335                 | 6                         | 5                          |
| DP 15254              | 207                 | 4                         | 1                          |
| DP 15262              | 275                 | 6                         | 6                          |
| SS 1737               | 1476                | 41                        | 39                         |
| JR 205                | 1204                | 42                        | 37                         |
| GS 2722               | 130                 | 4                         | 1                          |
| GS 5989               | 204                 | 1                         | 1                          |
| P-value               | 0.63                | 0.075                     | 0.09                       |
| P-value*              | 0.41                | <b><i>0.018</i></b>       | <b><i>0.011</i></b>        |

**Table S10. Genotypes of 114 candidate variants on 88 dogs.** SNP column indicates

[chromosome.base position], A1 and A2 columns indicate reference and alternative alleles, respectively.

F\_A and F\_U indicate the frequency of alternative alleles in OCD-enriched and control breeds, respectively.

| <b>SNP</b>     | <b>A1</b> | <b>F_A</b> | <b>F_U</b> | <b>A2</b> |
|----------------|-----------|------------|------------|-----------|
| chr17.46715746 | A         | 0.007246   | 0          | T         |
| chr17.46791415 | T         | 0.007246   | 0          | C         |
| chr18.48938780 | T         | 0.007246   | 0          | C         |
| chr29.44249614 | C         | 0.007246   | 0          | T         |
| chr35.18484947 | G         | 0          | 0.02632    | A         |
| chr18.57136368 | A         | 0.01449    | 0          | T         |
| chr29.44205914 | G         | 0.01449    | 0          | A         |
| chr29.44205937 | G         | 0.01449    | 0          | A         |
| chr29.44205943 | A         | 0.01449    | 0          | G         |
| chr29.44306347 | A         | 0.01449    | 0          | G         |
| chr35.18850625 | G         | 0.01449    | 0          | T         |
| chr35.18861596 | A         | 0.01449    | 0          | G         |
| chr7.63832008  | G         | 0.02174    | 0          | A         |
| chr17.46897529 | G         | 0.02174    | 0          | A         |
| chr29.44300177 | A         | 0.02174    | 0          | G         |
| chr35.18860763 | T         | 0.02174    | 0          | C         |
| chr7.63891778  | T         | 0.02174    | 0.07895    | C         |
| chr18.56889625 | T         | 0.02899    | 0.02632    | C         |
| chr29.44422867 | G         | 0.04348    | 0          | T         |
| chr7.61693835  | C         | 0.03623    | 0          | T         |
| chr7.63852056  | T         | 0.05072    | 0          | C         |
| chr3.65472187  | A         | 0.05797    | 0          | G         |
| chr7.61669045  | A         | 0.05797    | 0.02632    | T         |
| chr7.61693952  | C         | 0.05797    | 0.02632    | G         |
| chr35.18857719 | A         | 0.05797    | 0.02632    | T         |
| chr19.13696914 | C         | 0.07246    | 0          | T         |
| chr35.18679978 | C         | 0.07246    | 0          | G         |
| chr3.64690526  | A         | 0.07246    | 0.02632    | G         |
| chr7.63966490  | A         | 0.07246    | 0          | C         |
| chr29.44437957 | C         | 0.05797    | 0.1053     | T         |
| chr7.61728453  | C         | 0.05072    | 0.1053     | T         |
| chr7.63802530  | T         | 0.07971    | 0.02632    | C         |
| chr29.44306628 | G         | 0.0942     | 0          | A         |
| chr7.63796858  | T         | 0.07971    | 0.02632    | G         |
| chr7.63796857  | A         | 0.07971    | 0.05263    | C         |
| chr7.63852467  | C         | 0.1014     | 0          | T         |

|                |   |         |         |   |
|----------------|---|---------|---------|---|
| chr3.65188233  | G | 0.1159  | 0       | A |
| chr29.44393030 | G | 0.1014  | 0       | A |
| chr29.44397446 | G | 0.1232  | 0       | T |
| chr7.63806661  | G | 0.1087  | 0.02632 | A |
| chr7.63943045  | A | 0.1304  | 0       | G |
| chr7.63950125  | A | 0.1304  | 0       | G |
| chr35.18464093 | A | 0.07971 | 0.2105  | T |
| chr29.44447800 | T | 0.08696 | 0.1944  | C |
| chr7.63779775  | G | 0.0942  | 0.1316  | C |
| chr7.63943118  | A | 0.1377  | 0       | T |
| chr3.5470809   | C | 0.05797 | 0.3421  | T |
| chr17.27881676 | T | 0.1304  | 0.1579  | C |
| chr29.44180170 | A | 0.1765  | 0       | C |
| chr3.3896965   | A | 0.1812  | 0       | G |
| chr18.56754830 | A | 0.1594  | 0.05263 | G |
| chr18.56768794 | T | 0.1739  | 0       | C |
| chr3.3894924   | A | 0.1884  | 0       | G |
| chr7.63866863  | T | 0.1812  | 0.02632 | G |
| chr17.46781512 | A | 0.1884  | 0.02632 | G |
| chr3.64769048  | A | 0.1014  | 0.3947  | C |
| chr17.46791238 | C | 0.1449  | 0.2368  | T |
| chr18.57174849 | A | 0.1812  | 0.1316  | G |
| chr29.44338785 | A | 0.1667  | 0.1842  | G |
| chr17.46607594 | C | 0.2174  | 0.02632 | T |
| chr18.56737581 | T | 0.1522  | 0.2368  | C |
| chr29.44353724 | T | 0.1739  | 0.1842  | C |
| chr17.46478790 | C | 0.2029  | 0.1053  | T |
| chr3.61823869  | C | 0.1232  | 0.4211  | T |
| chr17.46781268 | C | 0.2391  | 0.02632 | T |
| chr7.63870467  | G | 0.2391  | 0.02632 | A |
| chr7.63870482  | C | 0.2391  | 0.02632 | A |
| chr7.63870496  | G | 0.2391  | 0.02632 | A |
| chr7.63870599  | G | 0.2391  | 0.02632 | A |
| chr3.5754697   | A | 0.1765  | 0.3333  | G |
| chr3.5471514   | G | 0.1739  | 0.3421  | A |
| chr3.5754700   | A | 0.1739  | 0.3684  | G |
| chr3.6063747   | G | 0.2029  | 0.3056  | A |
| chr18.56898066 | G | 0.1522  | 0.5     | A |
| chr29.44392979 | T | 0.1957  | 0.2632  | C |
| chr18.48821291 | T | 0.2391  | 0.2105  | C |
| chr7.63867146  | T | 0.1957  | 0.3947  | A |
| chr34.39420664 | T | 0.2754  | 0.1579  | G |
| chr29.44152594 | A | 0.2536  | 0.2632  | C |
| chr17.46791139 | C | 0.1812  | 0.5789  | G |
| chr18.48823350 | G | 0.2391  | 0.3684  | A |
| chr7.63866105  | A | 0.2319  | 0.4211  | C |
| chr17.46617340 | A | 0.2899  | 0.2778  | G |

|                |   |        |         |   |
|----------------|---|--------|---------|---|
| chr3.65472276  | A | 0.2391 | 0.4737  | G |
| chr17.46722666 | G | 0.3043 | 0.2632  | C |
| chr7.63845290  | T | 0.3768 | 0       | C |
| chr7.63857947  | T | 0.3551 | 0.1053  | C |
| chr7.63868442  | C | 0.3696 | 0.1053  | T |
| chr7.63912017  | A | 0.3986 | 0       | G |
| chr29.44336600 | T | 0.3551 | 0.1579  | G |
| chr7.63814306  | A | 0.3986 | 0.02778 | G |
| chr7.63814172  | T | 0.3986 | 0.05263 | C |
| chr7.63860234  | A | 0.3696 | 0.1579  | G |
| chr29.44513249 | G | 0.2754 | 0.5789  | A |
| chr29.44392126 | G | 0.2424 | 0.6316  | A |
| chr7.63845160  | T | 0.4348 | 0       | A |
| chr7.63870150  | A | 0.3116 | 0.5     | G |
| chr7.63814541  | C | 0.413  | 0.1579  | A |
| chr3.5559765   | G | 0.3623 | 0.4211  | A |
| chr7.63867618  | G | 0.3478 | 0.5     | C |
| chr7.63867879  | T | 0.3551 | 0.5     | A |
| chr34.38986422 | A | 0.3551 | 0.5     | G |
| chr29.44244625 | G | 0.4265 | 0.2105  | A |
| chr7.63870805  | T | 0.3623 | 0.5     | A |
| chr7.61865715  | A | 0.4348 | 0.2222  | G |
| chr7.63868034  | T | 0.3913 | 0.4737  | C |
| chr7.63867472  | C | 0.3913 | 0.5     | T |
| chr7.63868258  | T | 0.3913 | 0.5     | C |
| chr29.44489802 | A | 0.413  | 0.4737  | C |
| chr3.5681788   | T | 0.4275 | 0.5526  | G |
| chr7.63921141  | C | 0.5652 | 0.05263 | T |
| chr34.38956076 | G | 0.4203 | 0.6053  | A |
| chr7.63872172  | G | 0.4275 | 0.6316  | C |
| chr34.39405162 | A | 0.5662 | 0.2368  | G |

**Table S11. Ratio of Case/Control-Only Variants within Conserved Elements of Genes.**

ALL: all dogs; DP: Doberman; OTHERS: all dogs excluding DP; Ratio: (# case-only variants) / (# control only variants+1) within a gene and its 5kb flanking.

| Gene     | ALL  |         |       | DP   |         |       | OTHERS |         |       |
|----------|------|---------|-------|------|---------|-------|--------|---------|-------|
|          | Case | Control | Ratio | Case | Control | Ratio | Case   | Control | Ratio |
| CDH2     | 16   | 1       | 8.0   | 16   | 6       | 2.3   | 15     | 0       | 15.0  |
| CTNNA2   | 12   | 2       | 4.0   | 0    | 2       | 0.0   | 18     | 2       | 6.0   |
| ZFYVE28  | 3    | 0       | 3.0   | NA   | NA      | NA    | 3      | 0       | 3.0   |
| ATXN1    | 10   | 4       | 2.0   | 1    | 10      | 0.1   | 12     | 5       | 2.0   |
| TMEM212  | 2    | 0       | 2.0   | NA   | NA      | NA    | 1      | 0       | 1.0   |
| CHRM1    | 2    | 0       | 2.0   | NA   | NA      | NA    | 1      | 0       | 1.0   |
| KIAA1530 | 2    | 0       | 2.0   | NA   | NA      | NA    | 1      | 0       | 1.0   |
| NOP14    | 2    | 0       | 2.0   | NA   | NA      | NA    | 1      | 0       | 1.0   |
| SLC22A8  | 2    | 0       | 2.0   | 2    | 0       | 2.0   | 2      | 0       | 2.0   |
| PGCP     | 16   | 10      | 1.5   | 0    | 2       | 0.0   | 23     | 16      | 1.4   |
| FNDC3B   | 4    | 2       | 1.3   | 0    | 4       | 0.0   | 8      | 1       | 4.0   |
| CAPN14   | 2    | 1       | 1.0   | NA   | NA      | NA    | 2      | 0       | 2.0   |
| PLD1     | 3    | 2       | 1.0   | 0    | 1       | 0.0   | 6      | 2       | 2.0   |
| HAUS3    | 1    | 0       | 1.0   | NA   | NA      | NA    | 1      | 0       | 1.0   |
| MXD4     | 1    | 0       | 1.0   | NA   | NA      | NA    | 1      | 0       | 1.0   |
| SLC22A6  | 1    | 0       | 1.0   | 1    | 0       | 1.0   | 1      | 0       | 1.0   |
| SORCS2   | 1    | 0       | 1.0   | NA   | NA      | NA    | 1      | 0       | 1.0   |
| TADA2B   | 1    | 0       | 1.0   | NA   | NA      | NA    | 1      | 0       | 1.0   |
| TBC1D14  | 1    | 0       | 1.0   | NA   | NA      | NA    | 1      | 0       | 1.0   |
| TNIP2    | 1    | 0       | 1.0   | NA   | NA      | NA    | 1      | 0       | 1.0   |
| WDR74    | 1    | 0       | 1.0   | NA   | NA      | NA    | NA     | NA      | NA    |
| GALNT14  | 6    | 6       | 0.9   | 0    | 19      | 0.0   | 5      | 2       | 1.7   |
| PHACTR1  | 2    | 3       | 0.5   | 0    | 2       | 0.0   | 2      | 8       | 0.2   |
| KIAA0232 | 1    | 1       | 0.5   | NA   | NA      | NA    | 1      | 0       | 1.0   |
| LRRTM1   | 1    | 1       | 0.5   | NA   | NA      | NA    | 0      | 1       | 0.0   |
| KRTAP5-8 | 1    | 2       | 0.3   | 1    | 2       | 0.3   | 3      | 0       | 3.0   |
| C5orf13  | 1    | 2       | 0.3   | 3    | 0       | 3.0   | 1      | 5       | 0.2   |
| CAMK4    | 1    | 2       | 0.3   | 1    | 0       | 1.0   | 0      | 4       | 0.0   |
| AHNAK    | 0    | 1       | 0.0   | 1    | 0       | 1.0   | 0      | 1       | 0.0   |
| DUSP8    | 0    | 1       | 0.0   | 2    | 1       | 1.0   | NA     | NA      | NA    |
| MOB2     | 0    | 1       | 0.0   | NA   | NA      | NA    | 0      | 2       | 0.0   |
| TSPYL5   | 0    | 1       | 0.0   | NA   | NA      | NA    | 0      | 1       | 0.0   |
| FAM193A  | 0    | 1       | 0.0   | NA   | NA      | NA    | 0      | 1       | 0.0   |
| MAN2A1   | 0    | 5       | 0.0   | NA   | NA      | NA    | 0      | 3       | 0.0   |
| PJA2     | 0    | 2       | 0.0   | 1    | 0       | 1.0   | 0      | 2       | 0.0   |
| STX5     | 0    | 1       | 0.0   | 1    | 3       | 0.3   | 1      | 0       | 1.0   |
| TMEM232  | 0    | 8       | 0.0   | NA   | NA      | NA    | 0      | 8       | 0.0   |
| WDR36    | 0    | 1       | 0.0   | NA   | NA      | NA    | 0      | 1       | 0.0   |
| HCCA2    | NA   | NA      | NA    | 1    | 0       | 1.0   | 0      | 1       | 0.0   |
| TNFSF10  | NA   | NA      | NA    | 0    | 1       | 0.0   | NA     | NA      | NA    |
| EPB41L4A | NA   | NA      | NA    | 1    | 0       | 1.0   | 0      | 1       | 0.0   |
| FER      | NA   | NA      | NA    | 3    | 0       | 3.0   | 0      | 2       | 0.0   |
| MFSD10   | NA   | NA      | NA    | NA   | NA      | NA    | 1      | 0       | 1.0   |

**Table S12. Case-Only Missense Variants**

| Chr:position<br>nucleotide change | dbSNP           | Protein<br>Change | Gene     | Polyphen-2        | Case samples      |
|-----------------------------------|-----------------|-------------------|----------|-------------------|-------------------|
| chr3:62315616 G>A                 |                 | p.V40I            | SORCS2   | Benign            | SS 5991           |
| chr3:64757837 G>A                 |                 | p.R195H           | MXD4     | Unknown           | SS 5991           |
| chr3:64769048 C>A                 |                 | p.R404S           | HAUS3    | Possibly damaging | JR 3094           |
| chr3:65472187 G>A                 |                 | p.A712V           | KIAA1530 | Probably damaging | SS 5991           |
| chr17:27881676 C>T                |                 | p.D620N           | CAPN14   | Probably damaging | SS 5991           |
| chr18:56754830 G>A                | BICF2G630690061 | p.V475I           | SLC22A8  | Benign            | DP 15259, JR 3094 |

**Table S13. Oligonucleotide sequences (human) used for EMSA.**

|                  |                                    |
|------------------|------------------------------------|
| BIO-835.w.T.hu.F | BIO-ACCTGCACCAACTAATTAGGGTTCAAACC  |
| BIO-835.w.T.hu.R | BIO-GGTTTGAACCCTAATTAGTTGGTGCAGGT  |
| BIO-835.m.C.hu.F | BIO-ACCTGCACCAACTAGTTAGGGTTCAAACC  |
| BIO-835.m.C.hu.R | BIO-GGTTTGAACCCTAAGTTAGTTGGTGCAGGT |
| BIO-855.w.A.hu.F | BIO-TCGCTGGGTGGCTCATGGACCTGCA      |
| BIO-855.w.A.hu.R | BIO-TGCAGGTCCATGAGCCACCCAGCGA      |
| BIO-855.m.T.hu.F | BIO-TCGCTGGGTGGCACATGGACCTGCA      |
| BIO-855.m.T.hu.R | BIO-TGCAGGTCCATGTGCCACCCAGCGA      |
| 835.w.T.hu.F     | ACCTGCACCAACTAATTAGGGTTCAAACC      |
| 835.w.T.hu.R     | GGTTTGAACCCTAATTAGTTGGTGCAGGT      |
| 835.m.C.hu.F     | ACCTGCACCAACTAGTTAGGGTTCAAACC      |
| 835.m.C.hu.R     | GGTTTGAACCCTAAGTTAGTTGGTGCAGGT     |
| 855.w.A.hu.F     | TCGCTGGGTGGCTCATGGACCTGCA          |
| 855.w.A.hu.R     | TGCAGGTCCATGAGCCACCCAGCGA          |
| 855.m.T.hu.F     | TCGCTGGGTGGCACATGGACCTGCA          |
| 855.m.T.hu.R     | TGCAGGTCCATGTGCCACCCAGCGA          |

**Table S14. Oligonucleotide sequences (human) used for luciferase assay.**

|                   |                                     |
|-------------------|-------------------------------------|
| enhancer_F        | TTTGCTTTCTAACAATGAAACCAC            |
| enhancer_R        | TTGGCACAATTTACCGGTTT                |
| negative_F        | GAGTTGGGTGTAGGGGTCAA                |
| negative_R        | GGTTTGAACCTCCGCAATA                 |
| enhancer_mut835_F | TGGACCTGCACCAACTAGTTAGGGTTCAAACCAAC |
| enhancer_mut835_R | GTTGGTTTGAACCCTAACTAGTTGGTGCAGGTCCA |
| enhancer_mut855_F | CTCGCTGGGTGGCACATGGACCTGCAC         |
| enhancer_mut855_R | GTGCAGGTCCATGTGCCACCCAGCGAG         |
| vector_F          | CTAGCAAATAGGCTGTCCC                 |
| vector_R          | GACGATAGTCATGCCCGCG                 |



**Table S15. The primer sets inside and outside the PGCP deletion used for qPCR**

|             |                                         |
|-------------|-----------------------------------------|
| pgcp_del1_F | CGATCAGTGGCTTCCTTCTC                    |
| pgcp_del1_R | CGGACAATCCTGGCTTTTAA                    |
| pgcp_del2_F | CGATGACCCCATAACATTCC                    |
| pgcp_del2_R | AAGGTCTGGCTCCATCTGAA                    |
| pgcp_con1_F | GTCAGCAACAGAGCCCTTTC                    |
| pgcp_con1_R | CTCCCTCTGCTTGGA ACTTG                   |
| pgcp_con2_F | AGA A C A C T T T G G G G C A C T T G   |
| pgcp_con2_R | G A T T T C A C A C C C T G C T G A C C |

## Supplemental Figures

**Figure S1. Regions from GWAS used for INRICH analysis (red boxes) and targeted for sequencing (grey boxes).**

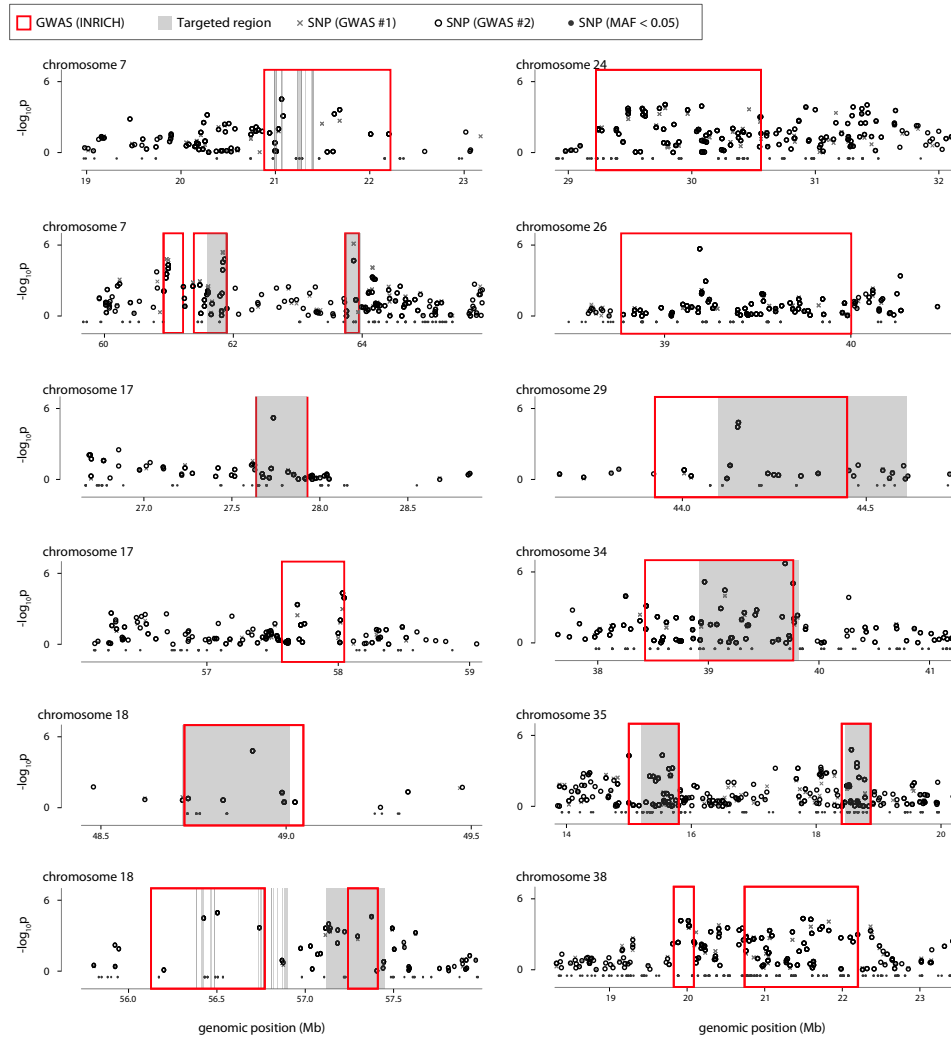

**Figure S2. Pileup data in the region of 1.2kb deletion at Chr29.** Pileup data for the affected Jack Russell Terrier is shown on the left, while the healthy breed-matched control is shown on the right. The top track shows the coverage of the genomic region, while the lower track shows the individual reads that are aligned to this region. Abnormal reads that may be indicative of deletion [*i.e.* reads with an insert size larger than expected] are shown in red.

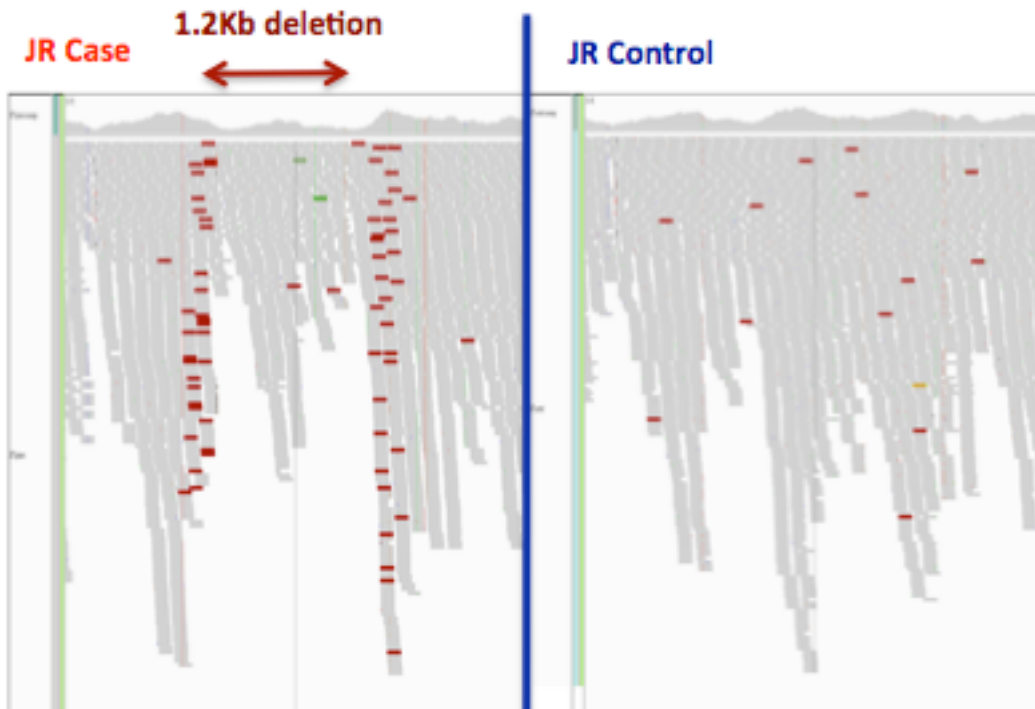

**Figure S3. A 1.2kb-deletion in PGCP gene near the CCD association signal.** Panel a shows  $-\log P$  values for each SNP in the GWA-study in Doberman pinscher dogs. The red and green lines represent the signals from MAGIC and BRLMM algorithm, respectively. Panel b shows a 1.2kb deletion found in one Jack Russell terrier occurred in the exon2 of PGCP gene.

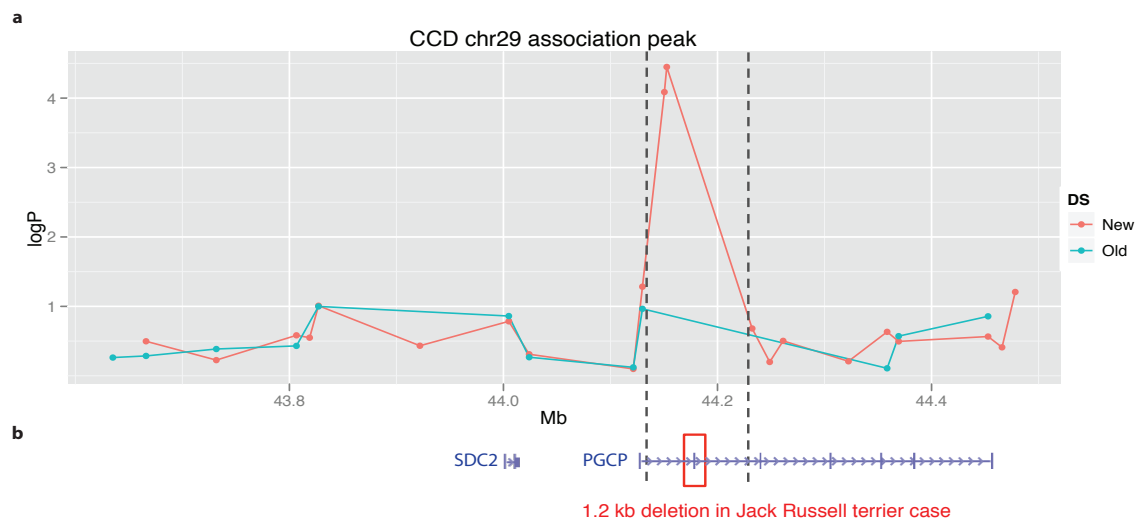

**Figure S4. DNA binding motifs at chr7:61.7Mb detected by TRANSFAC**

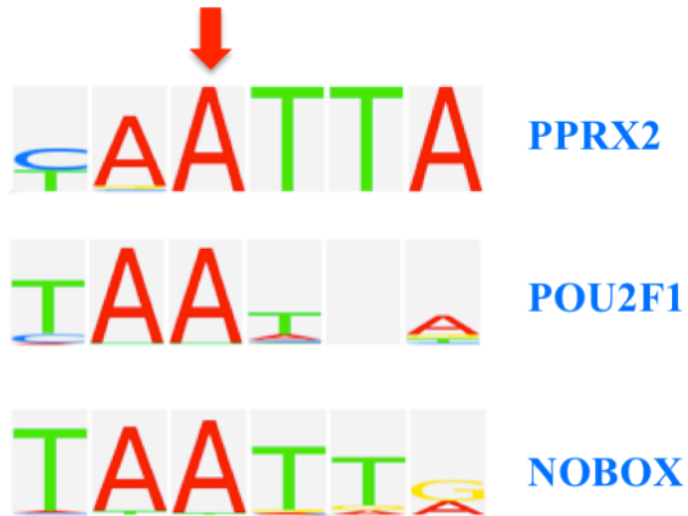

**Figure S5. No DNA-protein binding difference between 855 (A) and 855 (T).**

| P35 wide type T allele            | Gel shift |   |   |   | Supershift |   |   |   | R |
|-----------------------------------|-----------|---|---|---|------------|---|---|---|---|
|                                   | 1         | 2 | 3 | 4 | 5          | 6 | 7 | 8 |   |
| Nuclear Extract                   | -         | + | + | + | +          | + | + | + | + |
| Labeled Oligo                     | +         | + | + | + | +          | + | + | + | + |
| Unlabeled competitor (200X)       | -         | - | + | - | -          | - | - | - | - |
| Unlabeled cross-competitor (200X) | -         | - | - | + | -          | - | - | - | - |
| Anti-POU2F1 (10 ug)               | -         | - | - | - | +          | - | - | - | - |
| Anti-POU3F2 (10 ug)               | -         | - | - | - | -          | + | - | - | - |
| Anti-NOBOX (2.5 ug)               | -         | - | - | - | -          | - | + | - | - |
| Anti-PPRX2 (10 ug)                | -         | - | - | - | -          | - | - | + | - |

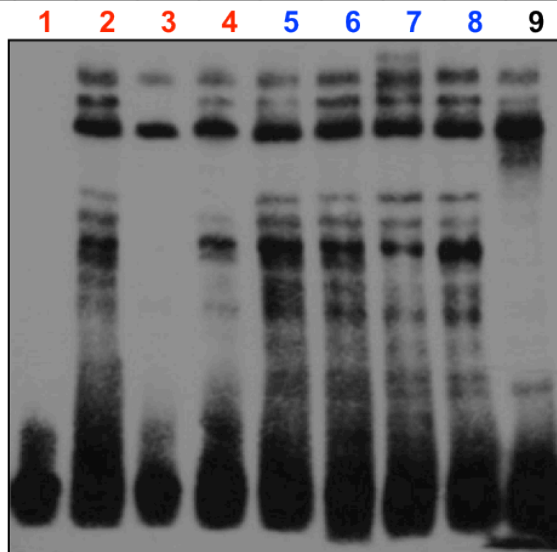

**Figure S6. Functional protein association network among 115 human OCD GWAS genes and CDH2, CTNNA2, ATXN1, and PGCP that were identified from our gene-based analysis.** The functional network was constructed using STRING[5]. 122 genes were extracted from Table 1 of the OCD GWAS by Stewart *et al.*[6], of which 115 genes were found in the STRING database. Note the functional connections of CDH2, CTNNA2, and ATXN1 with human OCD GWAS genes despite the generally under-connected network.

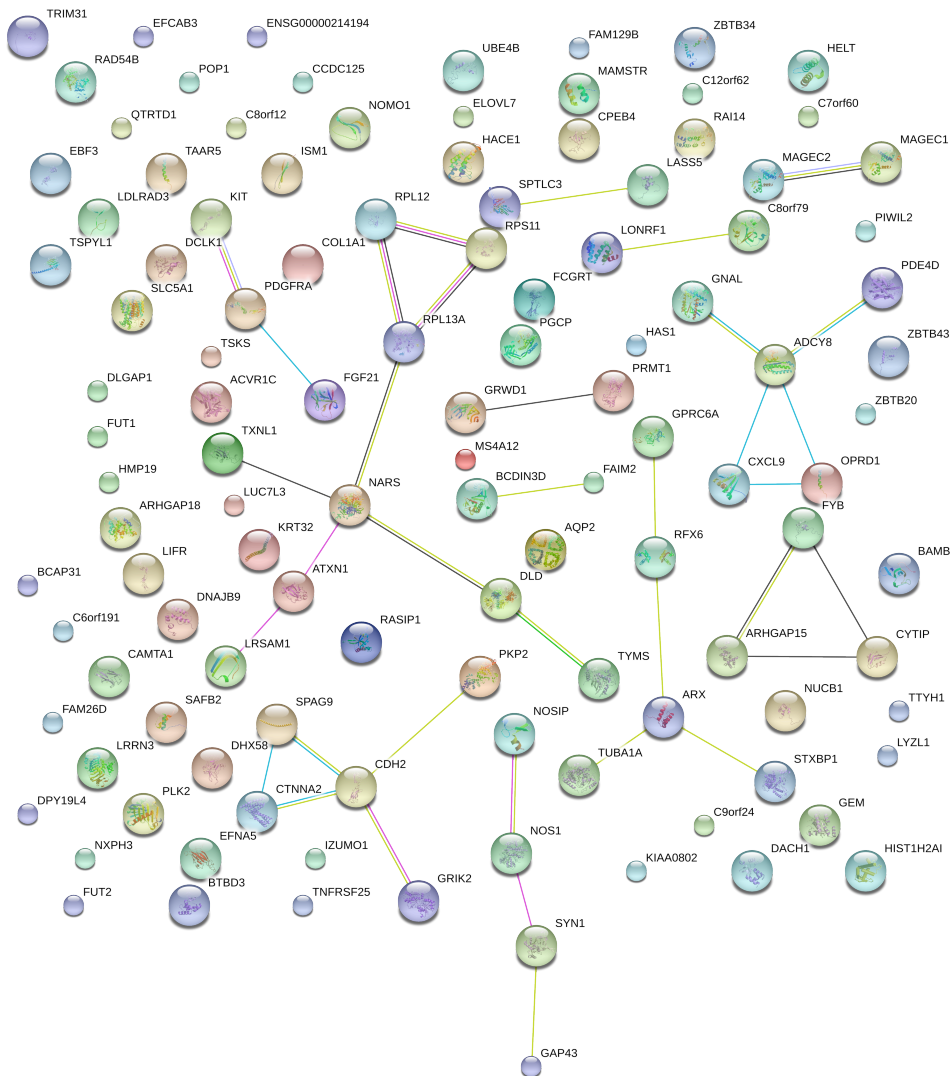

## References

1. Dodman NH, Karlsson EK, Moon-Fanelli A, Galdzicka M, Perloski M, Shuster L, Lindblad-Toh K, Ginns EI: **A canine chromosome 7 locus confers compulsive disorder susceptibility.** *Molecular psychiatry* 2010, **15**:8-10.
2. Adzhubei IA, Schmidt S, Peshkin L, Ramensky VE, Gerasimova A, Bork P, Kondrashov AS, Sunyaev SR: **A method and server for predicting damaging missense mutations.** *Nature methods* 2010, **7**:248-249.
3. Sarasin A: **UVSSA and USP7: new players regulating transcription-coupled nucleotide excision repair in human cells.** *Genome medicine* 2012, **4**:44.
4. Dear TN, Meier NT, Hunn M, Boehm T: **Gene structure, chromosomal localization, and expression pattern of Capn12, a new member of the calpain large subunit gene family.** *Genomics* 2000, **68**:152-160.
5. Franceschini A, Szklarczyk D, Frankild S, Kuhn M, Simonovic M, Roth A, Lin J, Minguez P, Bork P, von Mering C, Jensen LJ: **STRING v9.1: protein-protein interaction networks, with increased coverage and integration.** *Nucleic acids research* 2013, **41**:D808-815.
6. Stewart SE, Yu D, Scharf JM, Neale BM, Fagerness JA, Mathews CA, Arnold PD, Evans PD, Gamazon ER, Osiecki L, et al: **Genome-wide association study of obsessive-compulsive disorder.** *Molecular psychiatry* 2012.
